# Supplementary material
Source: PubMed Central journal article supplement (PMC9426033)
Supplement: 40900_2022_376_MOESM4_ESM.pdf [file 40900_2022_376_MOESM4_ESM.pdf]

## **Supplementary File 4**

### 1. Created

- Developed
- Initiated
- Designed
- Defined
- Concept emerged
- Enthusiasm led to grant being written

### 2. Moulded (added/subtracted/changed/shaped/improved)

- Enhanced
- Improved
- Strengthened
- Refined
- Shaped
- Revised
- Suggested
- Added
- Identified themes
- Identified others interested in the topic
- Identified what needed revision
- Changed/changes were made
- Modified
- Broadened
- Informed
- Contributed ideas
- Caught issues

### 3. Confirmed

- Confirmed
- Supported ideas being proposed

#### **4. Chosen/prioritized**

- Selected
- Chose
- Helped achieve consensus
- Helped decide/determine
- Prioritized
- Identified top interventions to be studied

#### **5. Successful**

- Contributed to the acceptance of the grant
- Helped secure the grant
- Integral to success

#### **6. Done/carried out**

- Participated in
- Prepared data
- Helped analyze data
- Answered participant questions
- Collected data
- Determined if items were gathering intended data
- Validated
- Established feasibility
- Piloted
- Enthusiasm led to project being conducted

#### **7. Limited/no/negative impact**

\*\*\*statements provided in manuscript tables 2-6
